# Supplementary material for: Apolipoprotein ɛ4 Status and Brain Structure 12 Months after Mild Traumatic Injury: Brain Age Prediction Using Brain Morphometry and Diffusion Tensor Imaging
Source: PubMed Central journal article supplement (PMC7865561; doi:10.3390/jcm10030418), 2021-01-22
Supplement: jcm-10-00418-s001.pdf [file jcm-10-00418-s001.pdf]

Table S1. Multivariable regression of APOE-ε4 status and DTI (AD and RD).

| ROI           | Comparison Groups        |       |         |                |
|---------------|--------------------------|-------|---------|----------------|
|               | APOE-ε4(-) vs APOE-ε4(+) |       |         |                |
|               | B                        | SE    | p-value | R <sup>2</sup> |
| AD-ATR L      | $1.318 \times 10^{-5}$   | 0.000 | 0.07    | 0.071          |
| AD-ATR R      | $9.353 \times 10^{-6}$   | 0.000 | 0.26    | 0.036          |
| AD-CG L       | $1.891 \times 10^{-6}$   | 0.000 | 0.75    | 0.166          |
| AD-CG R       | $-4.332 \times 10^{-6}$  | 0.000 | 0.53    | 0.086          |
| AD-CING L     | $8.781 \times 10^{-6}$   | 0.000 | 0.38    | 0.129          |
| AD-CING R     | $-2.388 \times 10^{-6}$  | 0.000 | 0.82    | 0.083          |
| AD-CST L      | $7.013 \times 10^{-6}$   | 0.000 | 0.20    | 0.302          |
| AD-CST R      | $6.293 \times 10^{-6}$   | 0.003 | 0.28    | 0.253          |
| AD-FMAJ       | $2.883 \times 10^{-6}$   | 0.000 | 0.63    | 0.490          |
| AD-FMIN       | $7.434 \times 10^{-7}$   | 0.000 | 0.93    | 0.333          |
| AD-IFOF L     | $-1.940 \times 10^{-6}$  | 0.000 | 0.73    | 0.052          |
| AD-IFOF R     | $-2.99 \times 10^{-6}$   | 0.000 | 0.60    | 0.012          |
| AD-ILF L      | $-6.001 \times 10^{-6}$  | 0.000 | 0.30    | 0.040          |
| AD-ILF R      | $-8.863 \times 10^{-6}$  | 0.000 | 0.12    | 0.073          |
| AD-SLF L      | $1.159 \times 10^{-6}$   | 0.000 | 0.81    | 0.082          |
| AD-SLF R      | $-9.312 \times 10^{-7}$  | 0.000 | 0.85    | 0.042          |
| AD-SLFT L     | $-4.647 \times 10^{-6}$  | 0.000 | 0.48    | 0.022          |
| AD-SLFT R     | $-7.823 \times 10^{-6}$  | 0.000 | 0.31    | 0.114          |
| AD-UF L       | $-5.01 \times 10^{-6}$   | 0.000 | 0.48    | 0.365          |
| AD-UF R       | $-4.739 \times 10^{-9}$  | 0.000 | 0.99    | 0.350          |
| AD-CCBody     | $7.839 \times 10^{-7}$   | 0.000 | 0.93    | 0.037          |
| AD-CCGenu     | $6.207 \times 10^{-6}$   | 0.000 | 0.60    | 0.100          |
| AD-CCSplenium | $8.223 \times 10^{-6}$   | 0.000 | 0.45    | 0.301          |
| AD-ws         | $1.277 \times 10^{-6}$   | 0.000 | 0.78    | 0.078          |
| RD-ATR L      | $4.389 \times 10^{-6}$   | 0.000 | 0.47    | 0.203          |
| RD-ATR R      | $8.342 \times 10^{-7}$   | 0.000 | 0.91    | 0.171          |
| RD-CG L       | $-8.235 \times 10^{-7}$  | 0.000 | 0.88    | 0.174          |
| RD-CG R       | $-3.003 \times 10^{-7}$  | 0.000 | 0.95    | 0.126          |
| RD-CING L     | $1.626 \times 10^{-5}$   | 0.000 | 0.04    | 0.228          |
| RD-CING R     | $1.229 \times 10^{-5}$   | 0.000 | 0.14    | 0.137          |
| RD-CST L      | $2.695 \times 10^{-6}$   | 0.000 | 0.56    | 0.135          |
| RD-CST R      | $5.471 \times 10^{-6}$   | 0.000 | 0.28    | 0.190          |
| RD-FMAJ       | $-1.175 \times 10^{-7}$  | 0.000 | 0.81    | 0.261          |
| RD-FMIN       | $-4.768 \times 10^{-6}$  | 0.000 | 0.47    | 0.249          |
| RD-IFOF L     | $-2.223 \times 10^{-6}$  | 0.000 | 0.66    | 0.196          |
| RD-IFOF R     | $-6.433 \times 10^{-6}$  | 0.000 | 0.22    | 0.193          |
| RD-ILF L      | $-1.008 \times 10^{-6}$  | 0.000 | 0.85    | 0.155          |
| RD-ILF R      | $-3.674 \times 10^{-6}$  | 0.000 | 0.48    | 0.114          |
| RD-SLF L      | $-1.680 \times 10^{-6}$  | 0.000 | 0.70    | 0.127          |
| RD-SLF R      | $-2.487 \times 10^{-6}$  | 0.000 | 0.58    | 0.154          |
| RD-SLFT L     | $-1.759 \times 10^{-6}$  | 0.000 | 0.73    | 0.092          |
| RD-SLFT R     | $-4.859 \times 10^{-6}$  | 0.000 | 0.35    | 0.203          |
| RD-UF L       | $-3.903 \times 10^{-6}$  | 0.000 | 0.46    | 0.197          |
| RD-UF R       | $-3.989 \times 10^{-6}$  | 0.000 | 0.47    | 0.123          |
| RD-CCBody     | $7.470 \times 10^{-6}$   | 0.000 | 0.38    | 0.204          |
| RD-CCGenu     | $-3.141 \times 10^{-6}$  | 0.000 | 0.68    | 0.304          |
| RD-CCSplenium | $-5.057 \times 10^{-7}$  | 0.000 | 0.93    | 0.164          |
| RD-ws         | $-2.286 \times 10^{-7}$  | 0.000 | 0.96    | 0.159          |

Adjusted for Age, sex and head coil

Abbreviations: Axial Diffusivity (AD), Radial diffusivity (RD), Anterior thalamic radiation (ATR), Cingulum (cingulate gyrus, CG), Cingulum (hippocampus, CING), Corticospinal tract (CST), Forceps major (FMAJ), Forceps minor (FMIN), Inferior fronto-occipital fasciculus (IFOF), Inferior longitudinal fasciculus (ILF), Superior longitudinal fasciculus (SLF), Superior longitudinal fasciculus (temporal part, SLFT), Uncinate fasciculus (UF), Corpus callosum (CC), Whole Skeleton (ws).
